# Supplementary material for: On Public Influence on People’s Interactions with Ordinary Biodiversity
Source: PLoS One. 2015 Jul 8;10(7):e0130215. doi: 10.1371/journal.pone.0130215 (PMC4495921; doi:10.1371/journal.pone.0130215)
Supplement: S1 Dataset — (XLSX) [file pone.0130215.s001.xlsx]

## Sheet: skandrani-row-data
location	location_type	sex	age	day	part_of_the_day	neutral behaviors	interaction behaviors
pompidou	touristic place	man	children	pomp1	AM	18	2
pompidou	touristic place	man	children	pomp1	noon	61	66
pompidou	touristic place	man	children	pomp1	PM	41	43
pompidou	touristic place	man	children	pomp2	AM	22	6
pompidou	touristic place	man	children	pomp2	noon	77	71
pompidou	touristic place	man	children	pomp2	PM	48	26
pompidou	touristic place	man	children	pomp3	AM	9	6
pompidou	touristic place	man	children	pomp3	noon	39	102
pompidou	touristic place	man	children	pomp3	PM	4	17
pompidou	touristic place	man	adults	pomp1	AM	168	10
pompidou	touristic place	man	adults	pomp1	noon	249	31
pompidou	touristic place	man	adults	pomp1	PM	272	33
pompidou	touristic place	man	adults	pomp2	AM	183	14
pompidou	touristic place	man	adults	pomp2	noon	224	33
pompidou	touristic place	man	adults	pomp2	PM	329	31
pompidou	touristic place	man	adults	pomp3	AM	83	41
pompidou	touristic place	man	adults	pomp3	noon	107	43
pompidou	touristic place	man	adults	pomp3	PM	129	32
pompidou	touristic place	man	elderly	pomp1	AM	42	2
pompidou	touristic place	man	elderly	pomp1	noon	56	7
pompidou	touristic place	man	elderly	pomp1	PM	54	8
pompidou	touristic place	man	elderly	pomp2	AM	72	6
pompidou	touristic place	man	elderly	pomp2	noon	51	3
pompidou	touristic place	man	elderly	pomp2	PM	91	6
pompidou	touristic place	man	elderly	pomp3	AM	13	11
pompidou	touristic place	man	elderly	pomp3	noon	9	2
pompidou	touristic place	man	elderly	pomp3	PM	11	3
pompidou	touristic place	woman	children	pomp1	AM	22	1
pompidou	touristic place	woman	children	pomp1	noon	73	33
pompidou	touristic place	woman	children	pomp1	PM	48	24
pompidou	touristic place	woman	children	pomp2	AM	27	8
pompidou	touristic place	woman	children	pomp2	noon	84	46
pompidou	touristic place	woman	children	pomp2	PM	22	20
pompidou	touristic place	woman	children	pomp3	AM	12	5
pompidou	touristic place	woman	children	pomp3	noon	38	70
pompidou	touristic place	woman	children	pomp3	PM	6	14
pompidou	touristic place	woman	adults	pomp1	AM	135	2
pompidou	touristic place	woman	adults	pomp1	noon	268	46
pompidou	touristic place	woman	adults	pomp1	PM	219	20
pompidou	touristic place	woman	adults	pomp2	AM	99	12
pompidou	touristic place	woman	adults	pomp2	noon	266	36
pompidou	touristic place	woman	adults	pomp2	PM	321	48
pompidou	touristic place	woman	adults	pomp3	AM	62	44
pompidou	touristic place	woman	adults	pomp3	noon	80	43
pompidou	touristic place	woman	adults	pomp3	PM	117	36
pompidou	touristic place	woman	elderly	pomp1	AM	31	0
pompidou	touristic place	woman	elderly	pomp1	noon	62	7
pompidou	touristic place	woman	elderly	pomp1	PM	63	12
pompidou	touristic place	woman	elderly	pomp2	AM	41	5
pompidou	touristic place	woman	elderly	pomp2	noon	38	8
pompidou	touristic place	woman	elderly	pomp2	PM	76	8
pompidou	touristic place	woman	elderly	pomp3	AM	5	0
pompidou	touristic place	woman	elderly	pomp3	noon	9	4
pompidou	touristic place	woman	elderly	pomp3	PM	9	6
ND	touristic place	man	children	ND1	AM	36	29
ND	touristic place	man	children	ND1	noon	46	38
ND	touristic place	man	children	ND1	PM	64	37
ND	touristic place	man	children	ND2	AM	4	6
ND	touristic place	man	children	ND2	noon	11	41
ND	touristic place	man	children	ND2	PM	7	21
ND	touristic place	man	children	ND3	AM	6	8
ND	touristic place	man	children	ND3	noon	25	24
ND	touristic place	man	children	ND3	PM	2	28
ND	touristic place	man	adults	ND1	AM	144	28
ND	touristic place	man	adults	ND1	noon	219	39
ND	touristic place	man	adults	ND1	PM	149	34
ND	touristic place	man	adults	ND2	AM	112	5
ND	touristic place	man	adults	ND2	noon	57	80
ND	touristic place	man	adults	ND2	PM	147	62
ND	touristic place	man	adults	ND3	AM	93	22
ND	touristic place	man	adults	ND3	noon	135	80
ND	touristic place	man	adults	ND3	PM	91	76
ND	touristic place	man	elderly	ND1	AM	45	3
ND	touristic place	man	elderly	ND1	noon	72	12
ND	touristic place	man	elderly	ND1	PM	85	36
ND	touristic place	man	elderly	ND2	AM	32	5
ND	touristic place	man	elderly	ND2	noon	29	16
ND	touristic place	man	elderly	ND2	PM	29	13
ND	touristic place	man	elderly	ND3	AM	26	3
ND	touristic place	man	elderly	ND3	noon	43	5
ND	touristic place	man	elderly	ND3	PM	25	13
ND	touristic place	woman	children	ND1	AM	45	25
ND	touristic place	woman	children	ND1	noon	35	31
ND	touristic place	woman	children	ND1	PM	43	13
ND	touristic place	woman	children	ND2	AM	4	0
ND	touristic place	woman	children	ND2	noon	7	29
ND	touristic place	woman	children	ND2	PM	2	4
ND	touristic place	woman	children	ND3	AM	8	10
ND	touristic place	woman	children	ND3	noon	30	25
ND	touristic place	woman	children	ND3	PM	10	26
ND	touristic place	woman	adults	ND1	AM	184	31
ND	touristic place	woman	adults	ND1	noon	255	50
ND	touristic place	woman	adults	ND1	PM	169	33
ND	touristic place	woman	adults	ND2	AM	128	7
ND	touristic place	woman	adults	ND2	noon	90	92
ND	touristic place	woman	adults	ND2	PM	139	32
ND	touristic place	woman	adults	ND3	AM	112	22
ND	touristic place	woman	adults	ND3	noon	162	75
ND	touristic place	woman	adults	ND3	PM	120	73
ND	touristic place	woman	elderly	ND1	AM	48	10
ND	touristic place	woman	elderly	ND1	noon	81	11
ND	touristic place	woman	elderly	ND1	PM	57	26
ND	touristic place	woman	elderly	ND2	AM	59	3
ND	touristic place	woman	elderly	ND2	noon	18	13
ND	touristic place	woman	elderly	ND2	PM	29	11
ND	touristic place	woman	elderly	ND3	AM	16	3
ND	touristic place	woman	elderly	ND3	noon	45	4
ND	touristic place	woman	elderly	ND3	PM	20	12
jardin plantes	urban parc	man	children	plant1	AM	9	6
jardin plantes	urban parc	man	children	plant1	noon	37	22
jardin plantes	urban parc	man	children	plant1	PM	37	9
jardin plantes	urban parc	man	children	plant2	AM	3	0
jardin plantes	urban parc	man	children	plant2	noon	33	9
jardin plantes	urban parc	man	children	plant2	PM	40	18
jardin plantes	urban parc	man	children	plant3	AM	6	2
jardin plantes	urban parc	man	children	plant3	noon	119	55
jardin plantes	urban parc	man	children	plant3	PM	60	13
jardin plantes	urban parc	man	adults	plant1	AM	41	1
jardin plantes	urban parc	man	adults	plant1	noon	43	11
jardin plantes	urban parc	man	adults	plant1	PM	71	4
jardin plantes	urban parc	man	adults	plant2	AM	34	1
jardin plantes	urban parc	man	adults	plant2	noon	73	8
jardin plantes	urban parc	man	adults	plant2	PM	72	12
jardin plantes	urban parc	man	adults	plant3	AM	68	2
jardin plantes	urban parc	man	adults	plant3	noon	109	9
jardin plantes	urban parc	man	adults	plant3	PM	106	10
jardin plantes	urban parc	man	elderly	plant1	AM	7	1
jardin plantes	urban parc	man	elderly	plant1	noon	15	2
jardin plantes	urban parc	man	elderly	plant1	PM	10	0
jardin plantes	urban parc	man	elderly	plant2	AM	3	0
jardin plantes	urban parc	man	elderly	plant2	noon	14	2
jardin plantes	urban parc	man	elderly	plant2	PM	41	5
jardin plantes	urban parc	man	elderly	plant3	AM	25	1
jardin plantes	urban parc	man	elderly	plant3	noon	20	1
jardin plantes	urban parc	man	elderly	plant3	PM	28	2
jardin plantes	urban parc	woman	children	plant1	AM	5	1
jardin plantes	urban parc	woman	children	plant1	noon	31	19
jardin plantes	urban parc	woman	children	plant1	PM	45	12
jardin plantes	urban parc	woman	children	plant2	AM	1	1
jardin plantes	urban parc	woman	children	plant2	noon	40	11
jardin plantes	urban parc	woman	children	plant2	PM	23	12
jardin plantes	urban parc	woman	children	plant3	AM	21	3
jardin plantes	urban parc	woman	children	plant3	noon	138	29
jardin plantes	urban parc	woman	children	plant3	PM	45	8
jardin plantes	urban parc	woman	adults	plant1	AM	27	2
jardin plantes	urban parc	woman	adults	plant1	noon	58	8
jardin plantes	urban parc	woman	adults	plant1	PM	82	5
jardin plantes	urban parc	woman	adults	plant2	AM	11	0
jardin plantes	urban parc	woman	adults	plant2	noon	82	7
jardin plantes	urban parc	woman	adults	plant2	PM	104	11
jardin plantes	urban parc	woman	adults	plant3	AM	49	4
jardin plantes	urban parc	woman	adults	plant3	noon	76	4
jardin plantes	urban parc	woman	adults	plant3	PM	85	15
jardin plantes	urban parc	woman	elderly	plant1	AM	8	0
jardin plantes	urban parc	woman	elderly	plant1	noon	4	1
jardin plantes	urban parc	woman	elderly	plant1	PM	22	0
jardin plantes	urban parc	woman	elderly	plant2	AM	1	0
jardin plantes	urban parc	woman	elderly	plant2	noon	8	1
jardin plantes	urban parc	woman	elderly	plant2	PM	28	1
jardin plantes	urban parc	woman	elderly	plant3	AM	32	3
jardin plantes	urban parc	woman	elderly	plant3	noon	27	0
jardin plantes	urban parc	woman	elderly	plant3	PM	27	3
Montsouris	urban parc	man	children	monts1	AM	3	1
Montsouris	urban parc	man	children	monts1	noon	4	2
Montsouris	urban parc	man	children	monts1	PM	43	3
Montsouris	urban parc	man	children	monts2	AM	30	0
Montsouris	urban parc	man	children	monts2	noon	6	0
Montsouris	urban parc	man	children	monts2	PM	16	12
Montsouris	urban parc	man	children	monts3	AM	2	0
Montsouris	urban parc	man	children	monts3	noon	27	31
Montsouris	urban parc	man	children	monts3	PM	31	9
Montsouris	urban parc	man	adults	monts1	AM	34	1
Montsouris	urban parc	man	adults	monts1	noon	39	7
Montsouris	urban parc	man	adults	monts1	PM	57	3
Montsouris	urban parc	man	adults	monts2	AM	24	0
Montsouris	urban parc	man	adults	monts2	noon	83	5
Montsouris	urban parc	man	adults	monts2	PM	75	10
Montsouris	urban parc	man	adults	monts3	AM	43	2
Montsouris	urban parc	man	adults	monts3	noon	48	4
Montsouris	urban parc	man	adults	monts3	PM	38	6
Montsouris	urban parc	man	elderly	monts1	AM	2	0
Montsouris	urban parc	man	elderly	monts1	noon	4	3
Montsouris	urban parc	man	elderly	monts1	PM	10	2
Montsouris	urban parc	man	elderly	monts2	AM	10	1
Montsouris	urban parc	man	elderly	monts2	noon	28	1
Montsouris	urban parc	man	elderly	monts2	PM	55	9
Montsouris	urban parc	man	elderly	monts3	AM	18	1
Montsouris	urban parc	man	elderly	monts3	noon	21	1
Montsouris	urban parc	man	elderly	monts3	PM	23	6
Montsouris	urban parc	woman	children	monts1	AM	1	0
Montsouris	urban parc	woman	children	monts1	noon	5	4
Montsouris	urban parc	woman	children	monts1	PM	44	5
Montsouris	urban parc	woman	children	monts2	AM	13	0
Montsouris	urban parc	woman	children	monts2	noon	6	0
Montsouris	urban parc	woman	children	monts2	PM	10	3
Montsouris	urban parc	woman	children	monts3	AM	3	0
Montsouris	urban parc	woman	children	monts3	noon	34	12
Montsouris	urban parc	woman	children	monts3	PM	26	6
Montsouris	urban parc	woman	adults	monts1	AM	42	4
Montsouris	urban parc	woman	adults	monts1	noon	119	13
Montsouris	urban parc	woman	adults	monts1	PM	38	8
Montsouris	urban parc	woman	adults	monts2	AM	14	1
Montsouris	urban parc	woman	adults	monts2	noon	62	3
Montsouris	urban parc	woman	adults	monts2	PM	67	6
Montsouris	urban parc	woman	adults	monts3	AM	27	3
Montsouris	urban parc	woman	adults	monts3	noon	36	6
Montsouris	urban parc	woman	adults	monts3	PM	31	7
Montsouris	urban parc	woman	elderly	monts1	AM	9	0
Montsouris	urban parc	woman	elderly	monts1	noon	2	3
Montsouris	urban parc	woman	elderly	monts1	PM	7	0
Montsouris	urban parc	woman	elderly	monts2	AM	22	0
Montsouris	urban parc	woman	elderly	monts2	noon	22	2
Montsouris	urban parc	woman	elderly	monts2	PM	47	6
Montsouris	urban parc	woman	elderly	monts3	AM	11	0
Montsouris	urban parc	woman	elderly	monts3	noon	17	1
Montsouris	urban parc	woman	elderly	monts3	PM	25	4
Gare Lyon	railway station	man	children	lyon1	AM	12	4
Gare Lyon	railway station	man	children	lyon1	noon	15	8
Gare Lyon	railway station	man	children	lyon1	PM	13	6
Gare Lyon	railway station	man	children	lyon2	AM	3	4
Gare Lyon	railway station	man	children	lyon2	noon	9	10
Gare Lyon	railway station	man	children	lyon2	PM	5	1
Gare Lyon	railway station	man	children	lyon3	AM	3	6
Gare Lyon	railway station	man	children	lyon3	noon	5	1
Gare Lyon	railway station	man	children	lyon3	PM	7	0
Gare Lyon	railway station	man	adults	lyon1	AM	129	19
Gare Lyon	railway station	man	adults	lyon1	noon	122	10
Gare Lyon	railway station	man	adults	lyon1	PM	149	2
Gare Lyon	railway station	man	adults	lyon2	AM	193	13
Gare Lyon	railway station	man	adults	lyon2	noon	167	19
Gare Lyon	railway station	man	adults	lyon2	PM	193	6
Gare Lyon	railway station	man	adults	lyon3	AM	106	4
Gare Lyon	railway station	man	adults	lyon3	noon	209	8
Gare Lyon	railway station	man	adults	lyon3	PM	113	3
Gare Lyon	railway station	man	elderly	lyon1	AM	49	14
Gare Lyon	railway station	man	elderly	lyon1	noon	56	12
Gare Lyon	railway station	man	elderly	lyon1	PM	46	3
Gare Lyon	railway station	man	elderly	lyon2	AM	75	2
Gare Lyon	railway station	man	elderly	lyon2	noon	76	2
Gare Lyon	railway station	man	elderly	lyon2	PM	101	8
Gare Lyon	railway station	man	elderly	lyon3	AM	32	2
Gare Lyon	railway station	man	elderly	lyon3	noon	9	1
Gare Lyon	railway station	man	elderly	lyon3	PM	10	1
Gare Lyon	railway station	woman	children	lyon1	AM	11	4
Gare Lyon	railway station	woman	children	lyon1	noon	10	10
Gare Lyon	railway station	woman	children	lyon1	PM	9	5
Gare Lyon	railway station	woman	children	lyon2	AM	7	2
Gare Lyon	railway station	woman	children	lyon2	noon	8	3
Gare Lyon	railway station	woman	children	lyon2	PM	13	2
Gare Lyon	railway station	woman	children	lyon3	AM	11	2
Gare Lyon	railway station	woman	children	lyon3	noon	1	1
Gare Lyon	railway station	woman	children	lyon3	PM	4	0
Gare Lyon	railway station	woman	adults	lyon1	AM	78	22
Gare Lyon	railway station	woman	adults	lyon1	noon	80	7
Gare Lyon	railway station	woman	adults	lyon1	PM	198	16
Gare Lyon	railway station	woman	adults	lyon2	AM	133	6
Gare Lyon	railway station	woman	adults	lyon2	noon	141	7
Gare Lyon	railway station	woman	adults	lyon2	PM	128	5
Gare Lyon	railway station	woman	adults	lyon3	AM	74	4
Gare Lyon	railway station	woman	adults	lyon3	noon	92	5
Gare Lyon	railway station	woman	adults	lyon3	PM	50	3
Gare Lyon	railway station	woman	elderly	lyon1	AM	67	13
Gare Lyon	railway station	woman	elderly	lyon1	noon	84	5
Gare Lyon	railway station	woman	elderly	lyon1	PM	51	3
Gare Lyon	railway station	woman	elderly	lyon2	AM	83	6
Gare Lyon	railway station	woman	elderly	lyon2	noon	82	2
Gare Lyon	railway station	woman	elderly	lyon2	PM	93	4
Gare Lyon	railway station	woman	elderly	lyon3	AM	55	3
Gare Lyon	railway station	woman	elderly	lyon3	noon	7	0
Gare Lyon	railway station	woman	elderly	lyon3	PM	5	0
Montparnasse	railway station	man	children	montp1	AM	14	3
Montparnasse	railway station	man	children	montp1	noon	5	1
Montparnasse	railway station	man	children	montp1	PM	2	1
Montparnasse	railway station	man	children	montp2	AM	1	1
Montparnasse	railway station	man	children	montp2	noon	3	0
Montparnasse	railway station	man	children	montp2	PM	1	0
Montparnasse	railway station	man	children	montp3	AM	0	1
Montparnasse	railway station	man	children	montp3	noon	5	0
Montparnasse	railway station	man	children	montp3	PM	4	1
Montparnasse	railway station	man	adults	montp1	AM	193	15
Montparnasse	railway station	man	adults	montp1	noon	230	10
Montparnasse	railway station	man	adults	montp1	PM	188	20
Montparnasse	railway station	man	adults	montp2	AM	93	21
Montparnasse	railway station	man	adults	montp2	noon	105	22
Montparnasse	railway station	man	adults	montp2	PM	84	7
Montparnasse	railway station	man	adults	montp3	AM	120	15
Montparnasse	railway station	man	adults	montp3	noon	126	12
Montparnasse	railway station	man	adults	montp3	PM	119	7
Montparnasse	railway station	man	elderly	montp1	AM	64	0
Montparnasse	railway station	man	elderly	montp1	noon	51	3
Montparnasse	railway station	man	elderly	montp1	PM	49	4
Montparnasse	railway station	man	elderly	montp2	AM	11	3
Montparnasse	railway station	man	elderly	montp2	noon	16	0
Montparnasse	railway station	man	elderly	montp2	PM	0	0
Montparnasse	railway station	man	elderly	montp3	AM	23	4
Montparnasse	railway station	man	elderly	montp3	noon	9	1
Montparnasse	railway station	man	elderly	montp3	PM	17	0
Montparnasse	railway station	woman	children	montp1	AM	14	1
Montparnasse	railway station	woman	children	montp1	noon	3	2
Montparnasse	railway station	woman	children	montp1	PM	3	0
Montparnasse	railway station	woman	children	montp2	AM	3	2
Montparnasse	railway station	woman	children	montp2	noon	3	0
Montparnasse	railway station	woman	children	montp2	PM	6	0
Montparnasse	railway station	woman	children	montp3	AM	1	0
Montparnasse	railway station	woman	children	montp3	noon	4	0
Montparnasse	railway station	woman	children	montp3	PM	2	0
Montparnasse	railway station	woman	adults	montp1	AM	149	10
Montparnasse	railway station	woman	adults	montp1	noon	196	6
Montparnasse	railway station	woman	adults	montp1	PM	178	24
Montparnasse	railway station	woman	adults	montp2	AM	96	37
Montparnasse	railway station	woman	adults	montp2	noon	139	21
Montparnasse	railway station	woman	adults	montp2	PM	71	5
Montparnasse	railway station	woman	adults	montp3	AM	85	8
Montparnasse	railway station	woman	adults	montp3	noon	156	9
Montparnasse	railway station	woman	adults	montp3	PM	121	6
Montparnasse	railway station	woman	elderly	montp1	AM	64	3
Montparnasse	railway station	woman	elderly	montp1	noon	73	0
Montparnasse	railway station	woman	elderly	montp1	PM	80	6
Montparnasse	railway station	woman	elderly	montp2	AM	6	1
Montparnasse	railway station	woman	elderly	montp2	noon	15	1
Montparnasse	railway station	woman	elderly	montp2	PM	4	1
Montparnasse	railway station	woman	elderly	montp3	AM	20	2
Montparnasse	railway station	woman	elderly	montp3	noon	14	1
Montparnasse	railway station	woman	elderly	montp3	PM	13	0
